# Supplementary material
Source: Springer Nature journal article supplement (https://www.springermedizin.de/resource/supplementary/12880_2007_50_MOESM2_ESM.pdf/9450430)
Supplement: MOESM2 [file 9450430]

[PREV CLASS](#) [NEXT CLASS](#)[FRAMES](#) [NO FRAMES](#) [All Classes](#)SUMMARY: [NESTED](#) | [FIELD](#) | [CONSTR](#) | [METHOD](#)DETAIL: [FIELD](#) | [CONSTR](#) | [METHOD](#)

---

iiv.display

**Class SingleImg**

```
java.lang.Object
├── java.awt.Component
│   ├── java.awt.Container
│       ├── javax.swing.JComponent
│           ├── iiv.display.DisplayComponent
│               └── iiv.display.SingleImg
```

**All Implemented Interfaces:**

[CNUFileObject](#), [CoordinateMappable](#), [Croppable](#), [FilterSampling](#), [Flippable](#), [iiVScriptable](#), [ImageObserver](#), [LocationMapping](#), [MenuContainer](#), [NumberFormattable](#), [Overlayable](#), [Rotatable](#), [ScaleInterface](#), [Serializable](#), [ShowPointImage](#), [ShowStatus](#), [SliceNumbering](#), [Zoomable](#)

---

public class **SingleImg**extends [DisplayComponent](#)implements [ScaleInterface](#), [CoordinateMappable](#), [SliceNumbering](#), [CNUFileObject](#), [Overlayable](#), [NumberFormattable](#), [iiVScriptable](#)

Component to display a single slice of CNUData as an image with flip, zoom and show point abilities.

**Since:**

iiV1.0

**See Also:**[CNUViewer](#), [Container](#), [Serialized Form](#)
